# Supplementary material for: Slow magnetic relaxation for cobalt(ii) complexes in axial bipyramidal environment: an S = 1/2 spin case
Source: Royal Society of Chemistry journal article supplement (doi:10.1039/d2dt00880g), 2022-01-01
Supplement: d2dt00880g1.pdf [file d2dt00880g1.pdf]

Electronic Supplementary Material (ESI) for Dalton Trans.

## "Slow magnetic relaxation for cobalt(II) complexes in axial bipyramidal environment: an $S = \frac{1}{2}$ spin case."

Evangelos Pilichos,<sup>a</sup> Mercè Font-Bardia,<sup>b</sup> Joan Cano,<sup>c</sup> Albert Escuer,<sup>\*a</sup> and Júlia Mayans <sup>\*a</sup>

<sup>a</sup> Departament de Química Inorgànica i Orgànica, Secció Inorgànica and Institute of Nanoscience (IN<sup>2</sup>UB) and Nanotechnology, Universitat de Barcelona, Martí i Franquès 1-11, Barcelona-08028, Spain.

<sup>b</sup> Departament de Mineralogia, Cristal·lografia i Dipòsits Minerals, Universitat de Barcelona, Martí Franquès s/n, 08028 Barcelona (Spain) and Unitat de Difracció de R-X. Centre Científic i Tecnològic de la Universitat de Barcelona (CCiTUB), Solé i Sabarís 1-3. 08028 Barcelona.

<sup>c</sup> Instituto de Ciencia Molecular (ICMol), Universitat de València, 46980 Paterna (València), Spain

### 1- Characterization.

**Fig. S1.** Powder X-ray spectra of the reference complex **1** and its diluted analogous **1D**.

**Fig. S2.** IR spectra for complexes **1** and **1D**

**Fig. S3.** IR spectra for complexes **2** and **3**.

### 2-Structural aspects.

**Table S1.** SHAPE measures for the Co<sup>II</sup> cation of complex **1**.

**Fig. S4.** Plot of the coordination sphere of the Co<sup>II</sup> cation for complex **1**,

**Fig. S5.** Detail of the H-bonds promoted for complex **1**.

**Table S2.** Bond parameters for the bifurcated H-bonds corresponding to complex **1**.

**Fig. S6.** Molecular structure of complex **2R** from the partial structure resolution.

### 3-Magnetic data.

**Fig. S7.** Left, magnetization vs. field for complexes **1**, **2R** and **3SS**. Right, reduced magnetization for complex **1**.

**Fig. S8.**  $\chi_M''$  dependence of the transverse field for complexes **1** and **2R**.

**Fig. S9.**  $\chi_M'(T)$  and  $\chi_M'(v)$  for complexes **1**, **1D** and **2R**.

**Fig. S10.** Argand plots for complexes **1**, **1D** and **2R**.

**Fig. S11.** Log-log plot for complex **1**.

**Fig. S12.** Plot of  $\ln(1/2\pi\nu)$  vs.  $T^{-1}$  from the  $\chi_M''(T)$  data for complexes **1**, **1D** and **2**.

**Fig. S13.** Plot of  $\tau$  vs. inverse of temperature showing the low temperature increase of  $t$  for the diluted complex **1D**.

## 1- Characterization.

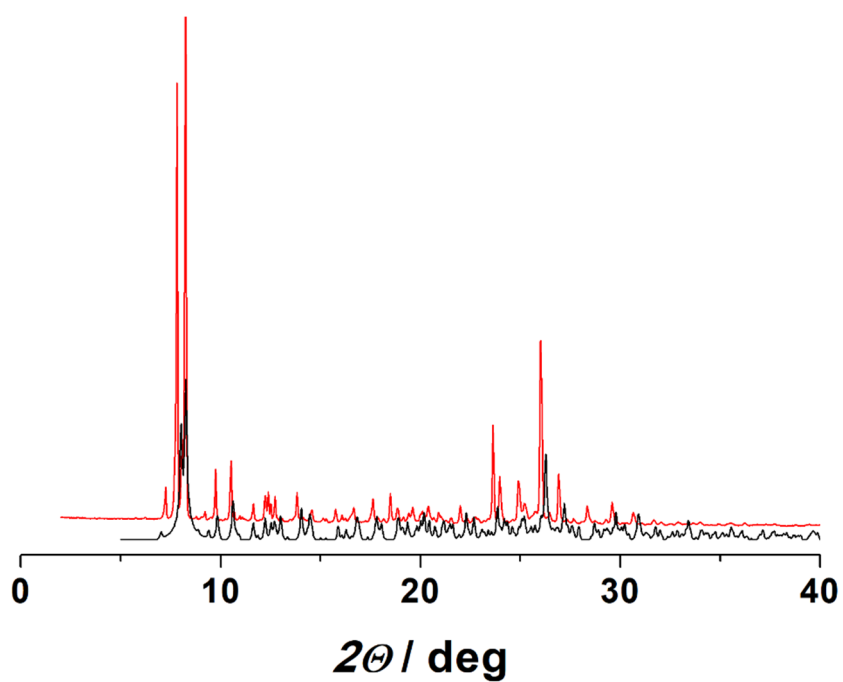

**Fig. S1.** Powder X-ray spectra of the reference complex **1** (black line) and its diluted analogue **1D**.

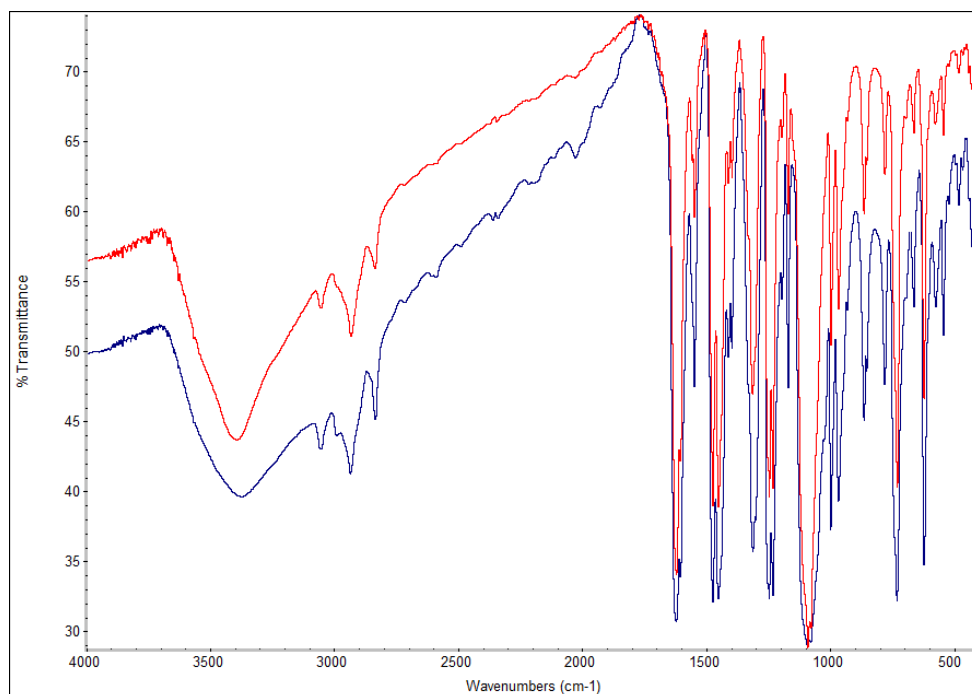

**Fig. S2.** IR spectra for complexes **1** (red) and **1D**. Characteristic bands: st. C-H 3000-2800 cm<sup>-1</sup>; N=C iminic ~1600 cm<sup>-1</sup>; st. ClO<sub>4</sub><sup>-</sup> 1075 cm<sup>-1</sup>;  $\delta$  ClO<sub>4</sub><sup>-</sup> 620 cm<sup>-1</sup>.

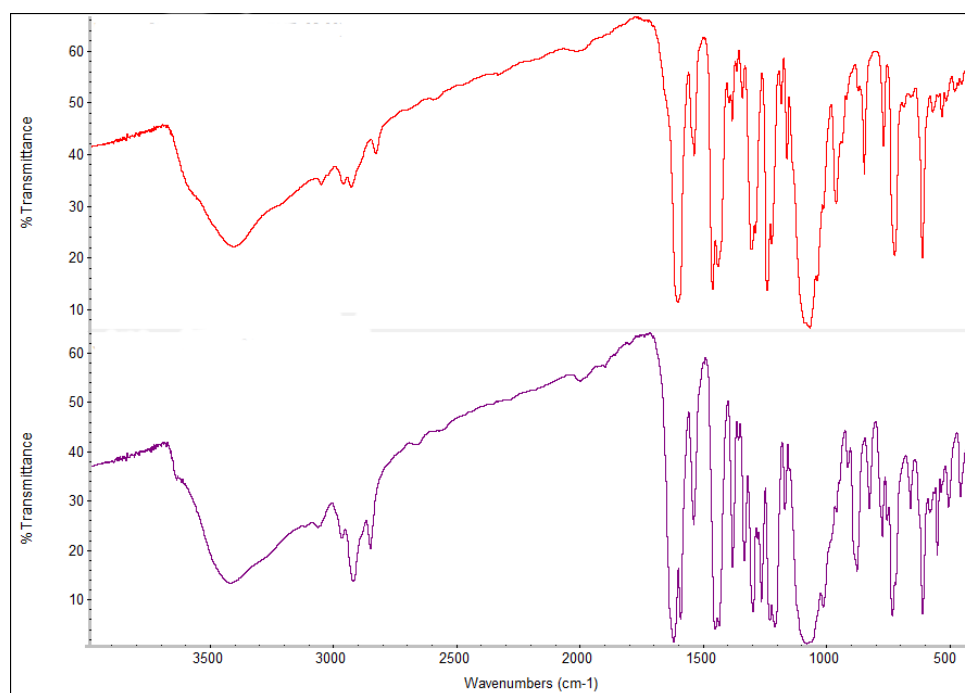

**Fig. S3.** IR spectra for complexes **2** (top) and **3** (bottom).

## 2-Structural aspects.

**Table S1.** SHAPE measures for the Co<sup>II</sup> cation of complex **1**.  $S(P) = 0$  corresponds to a structure fully coincident in shape with the reference polyhedron P, regardless of size and orientation. The closest polyhedron is highlighted in red.

|                     |      |                     |             |
|---------------------|------|---------------------|-------------|
| $S(\text{vOC-5})$   | 6.80 | $S(\text{PBPY-7})$  | <b>1.64</b> |
| $S(\text{TBPY-5})$  | 6.82 | $S(\text{COC-7})$   | 8.17        |
| $S(\text{SPY-5})$   | 6.79 | $S(\text{CTPR-7})$  | 6.59        |
| $S(\text{JTBPY-5})$ | 8.81 | $S(\text{JPBPY-7})$ | 3.60        |

**Ideal ML<sub>5</sub> polyhedra:** vOC-5 (C<sub>4v</sub>) Vacant octahedron; TBPY-5 (D<sub>3h</sub>) Trigonal bipyramid; SPY-5 (C<sub>4v</sub>) Spherical square pyramid; JTBPY-5 (D<sub>3h</sub>) Johnson trigonal bipyramid J12.

**Ideal ML<sub>7</sub> polyhedra:** PBPY-7 (D<sub>5h</sub>) Pentagonal bipyramid; COC-7 (C<sub>3v</sub>) Capped octahedron; CTPR-7 (C<sub>2v</sub>) Capped trigonal prism; JPBPY-7 (D<sub>5h</sub>) Johnson pentagonal bipyramid J13; JETPY-7 (C<sub>3v</sub>) Johnson elongated triangular pyramid J7.

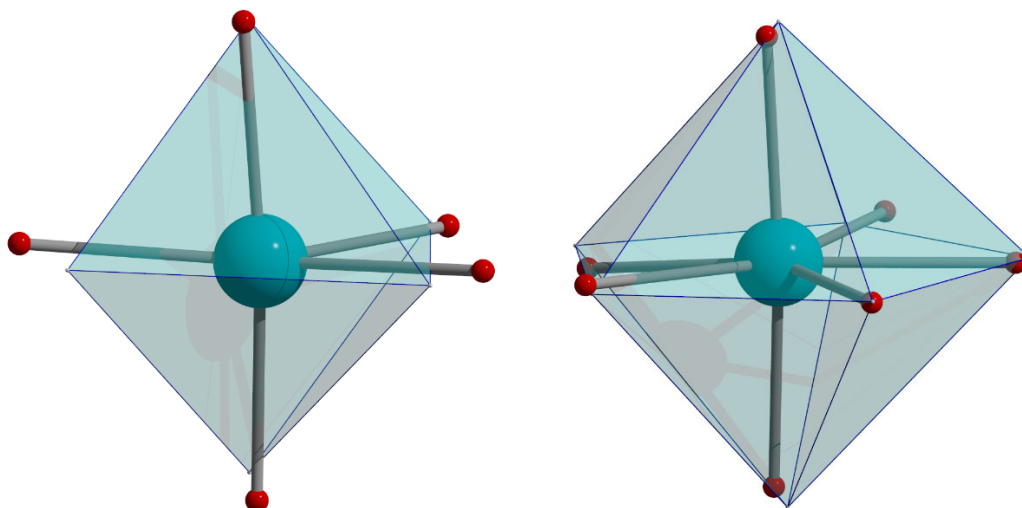

**Fig. S4.** Plot of the coordination sphere of the  $\text{Co}^{\text{II}}$  cation for complex **1**, referenced to the ideal polyhedra trigonal bipyramid (left) and pentagonal bipyramid (right).

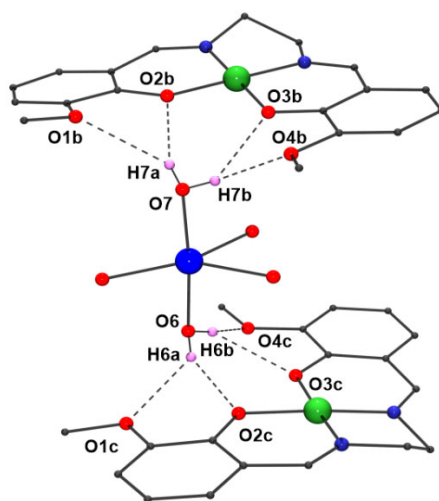

**Fig. S5.** Detail of the H-bonds promoted by the axially coordinated water molecules and the capping  $[\text{NiL1}]$  fragments for complex **1**.

**Table S2.** Bond parameters for the bifurcated H-bonds corresponding to complex **1**.

|                 | $d \text{O} \cdots \text{O}'$ (Å) |         | $d \text{H} \cdots \text{O}'$ (Å) |                     | O-H $\cdots$ O (deg.) |
|-----------------|-----------------------------------|---------|-----------------------------------|---------------------|-----------------------|
| O6 $\cdots$ O1c | 2.976(4)                          | H6a-O1c | 2.29(3)                           | O6-H6a $\cdots$ O3c | 127(2)                |
| O6 $\cdots$ O2c | 2.761(4)                          | H6a-O2c | 2.10(2)                           | O6-H6a $\cdots$ O4c | 159(3)                |
| O6 $\cdots$ O3c | 2.848(4)                          | H6b-O3c | 2.35(3)                           | O6-H6b $\cdots$ O1c | 135(3)                |
| O6 $\cdots$ O4c | 2.861(4)                          | H6b-O4c | 2.03(2)                           | O6-H6b $\cdots$ O2c | 152(3)                |
| O7 $\cdots$ O1b | 3.010(4)                          | H7a-O1b | 2.46(3)                           | O7-H7a $\cdots$ O1b | 127(3)                |
| O7 $\cdots$ O2b | 2.804(4)                          | H7a-O2b | 2.04(3)                           | O7-H7a $\cdots$ O2b | 160(3)                |
| O7 $\cdots$ O3b | 2.860(4)                          | H7b-O3b | 2.34(4)                           | O7-H7b $\cdots$ O3b | 123(3)                |
| O7 $\cdots$ O4b | 2.971(5)                          | H7b-O4b | 2.20(4)                           | O7-H7b $\cdots$ O4b | 161(3)                |

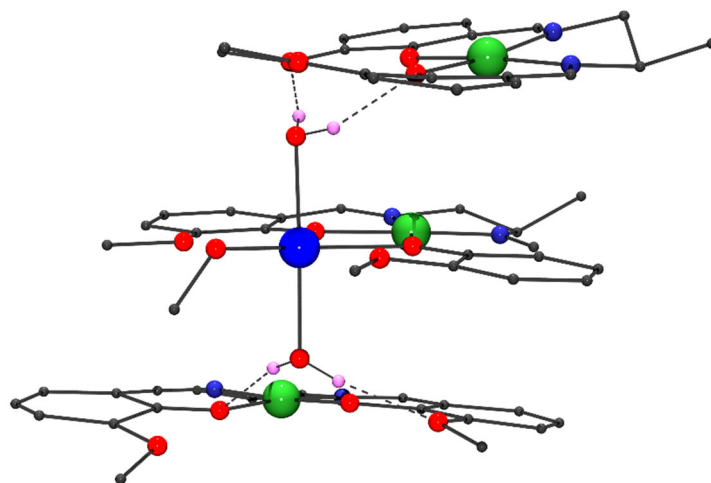

**Fig. S6.** Molecular structure of complex **2R** from the partial structure resolution.

### 3-Magnetic data.

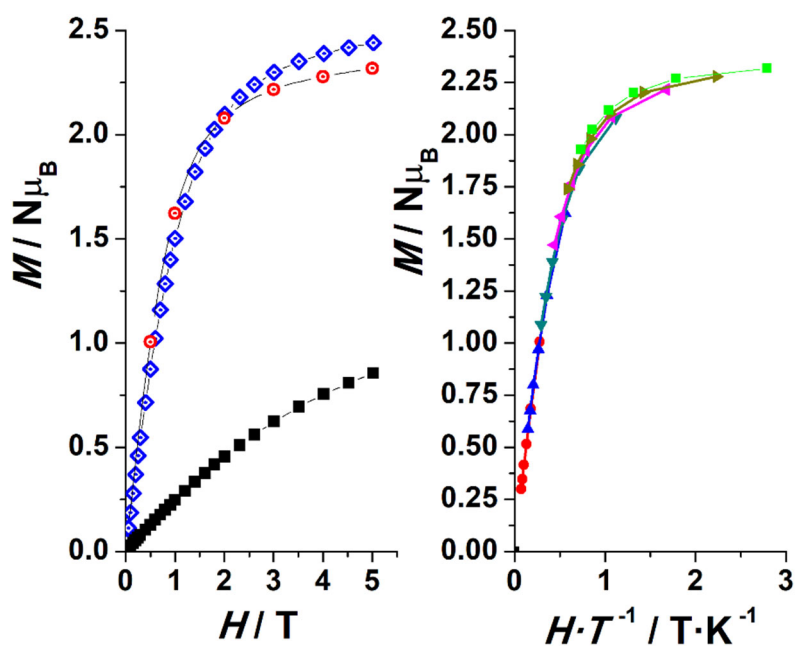

**Fig. S7.** Left, magnetization vs. field for complexes **1** (red circles), **2R** (blue diamonds) and **3SS** (black squares). Right, reduced magnetization for complex **1** showing the superimposable plots in the 1.8-6.8 range of temperature (increment 1 K).

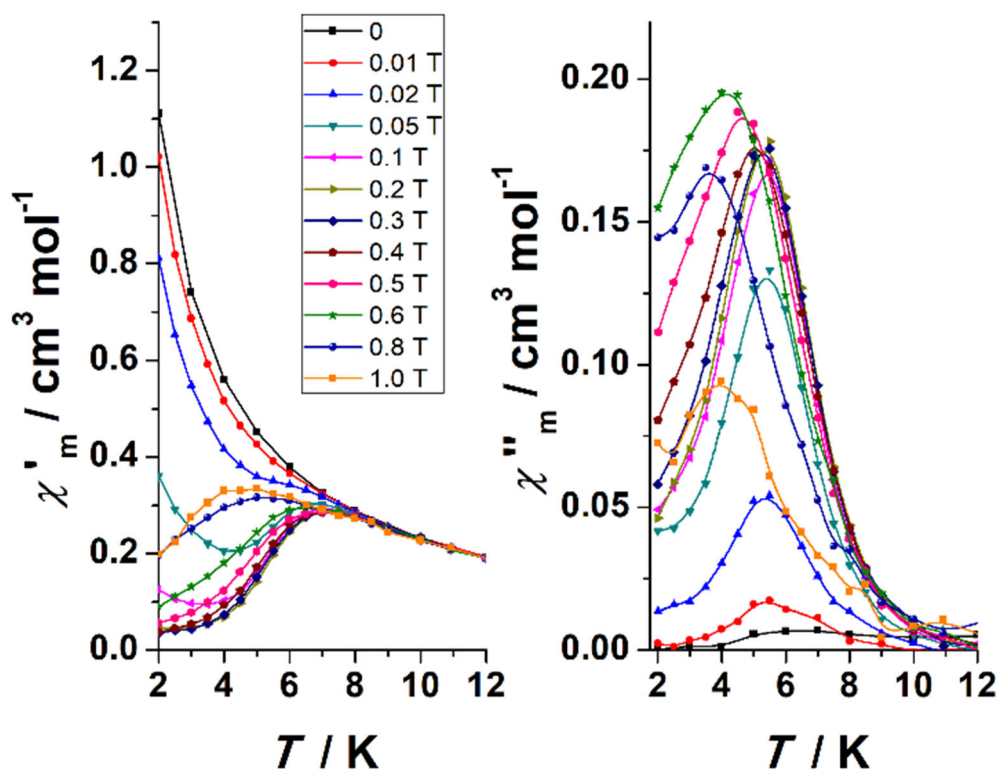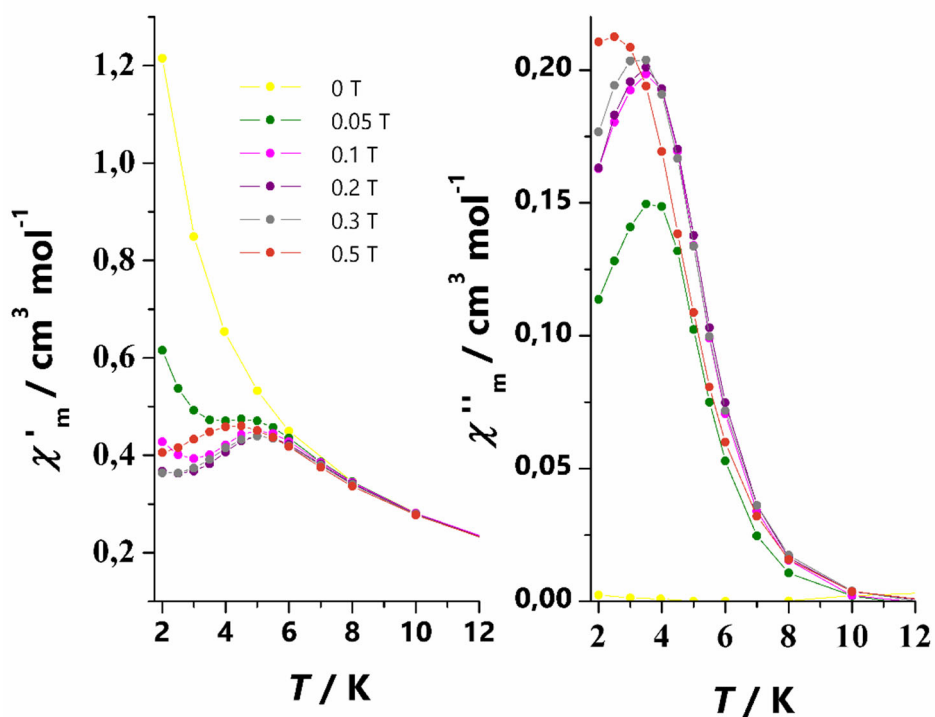

Fig. S8.  $\chi_M''$  dependence of the transverse field for complexes **1** (top) and **2R** (bottom).

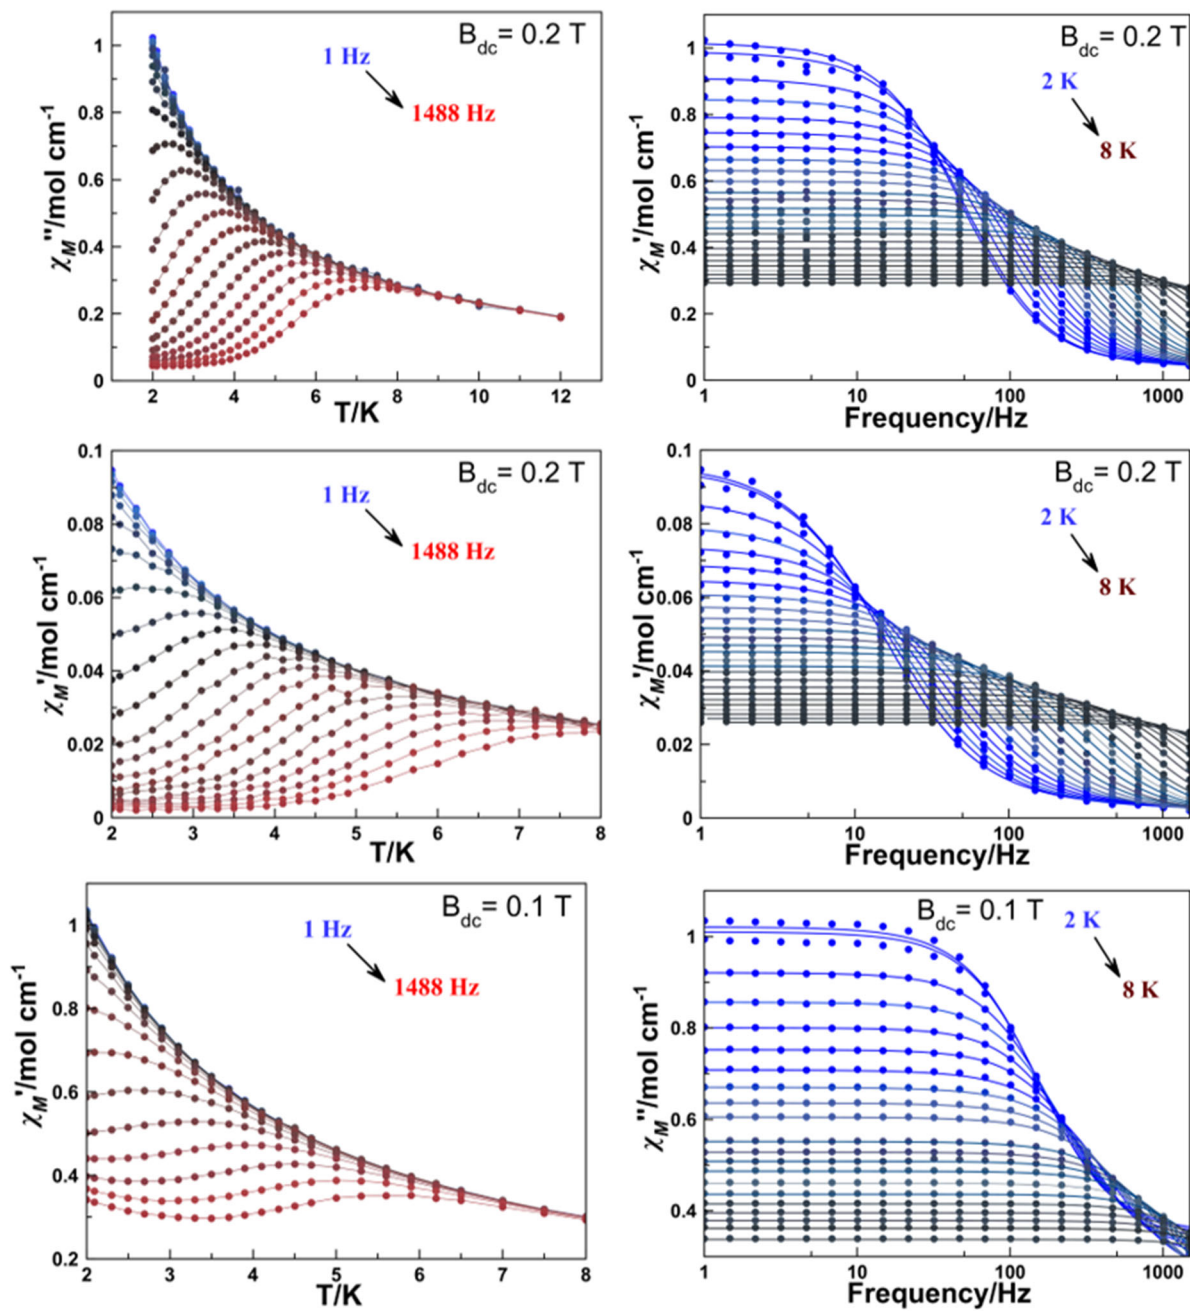

Fig. S9.  $\chi_M'(T)$  and  $\chi_M'(\nu)$  for complexes **1**, **1D** and **2R**.

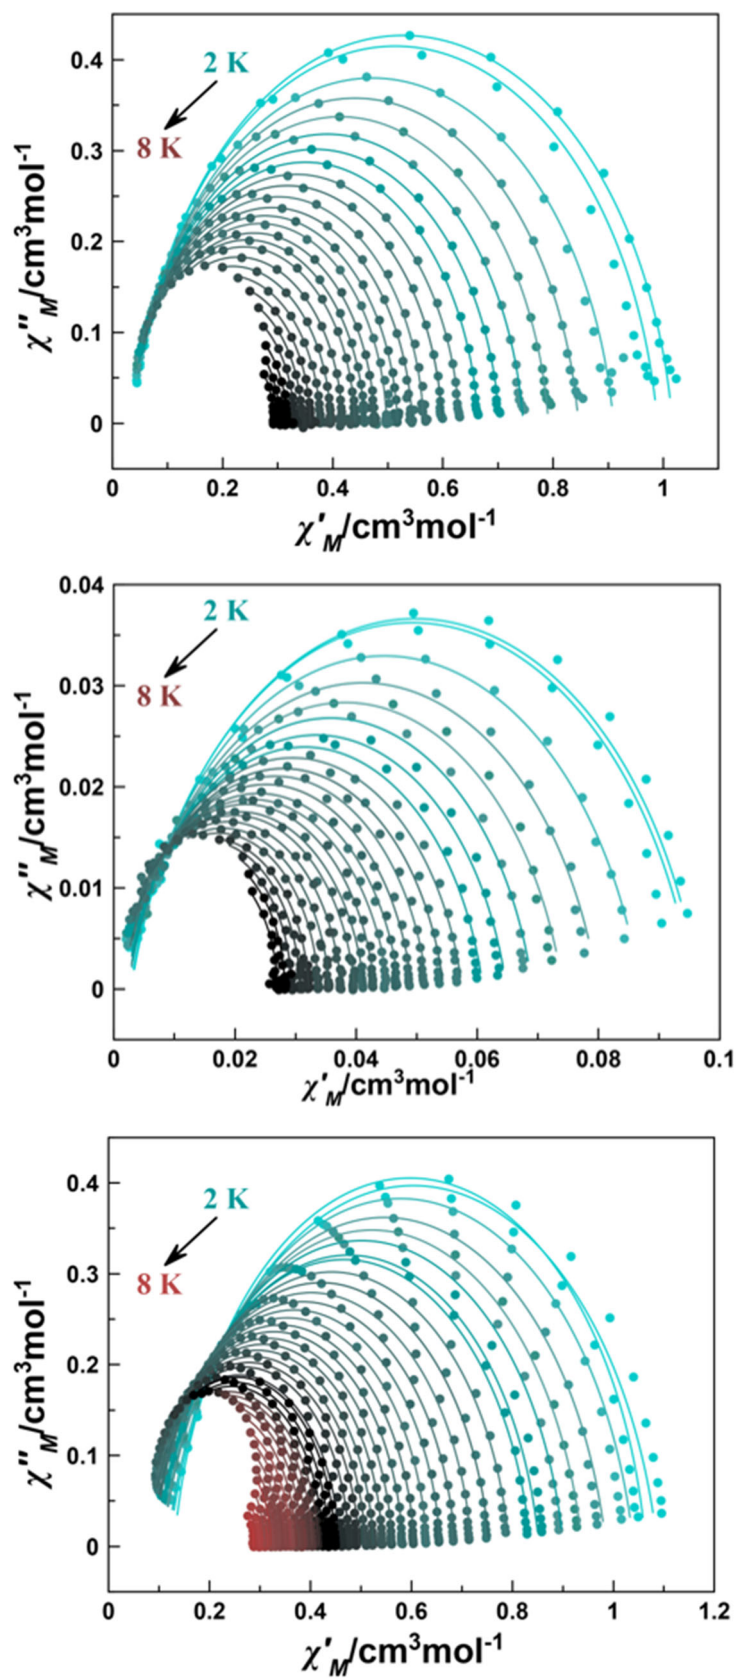

**Fig. S10.** Argand plots for complexes **1**, **1D** and **2R**. Solid lines show the best fit of the experimental data.



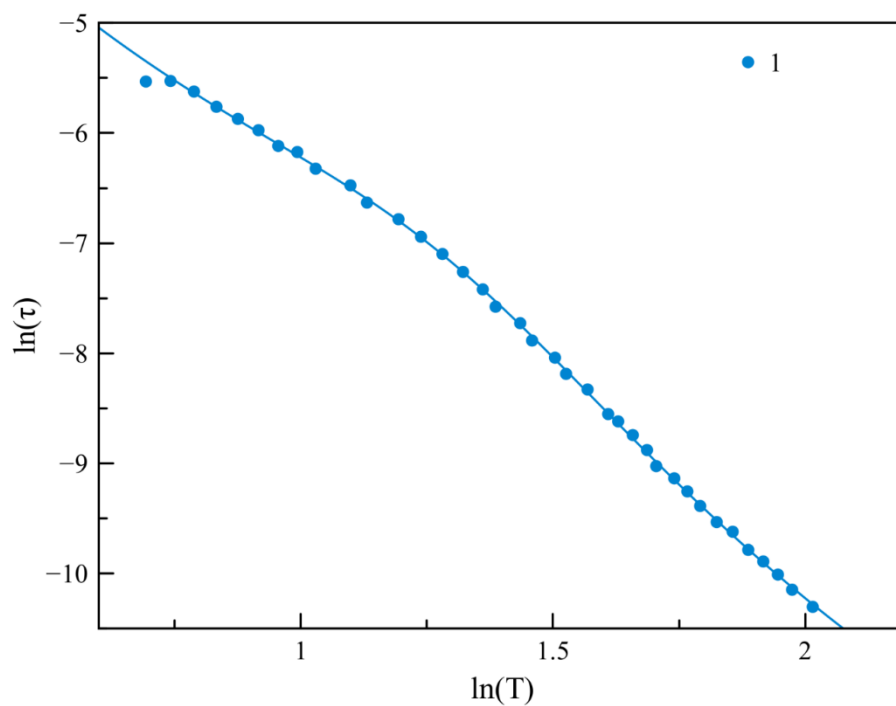

**Fig. S11.** Temperature dependence of the relaxation time of **1** plotted in log-log scale. The two different slopes at low and high temperature hints at dominant direct and Raman processes in the two temperature regions.

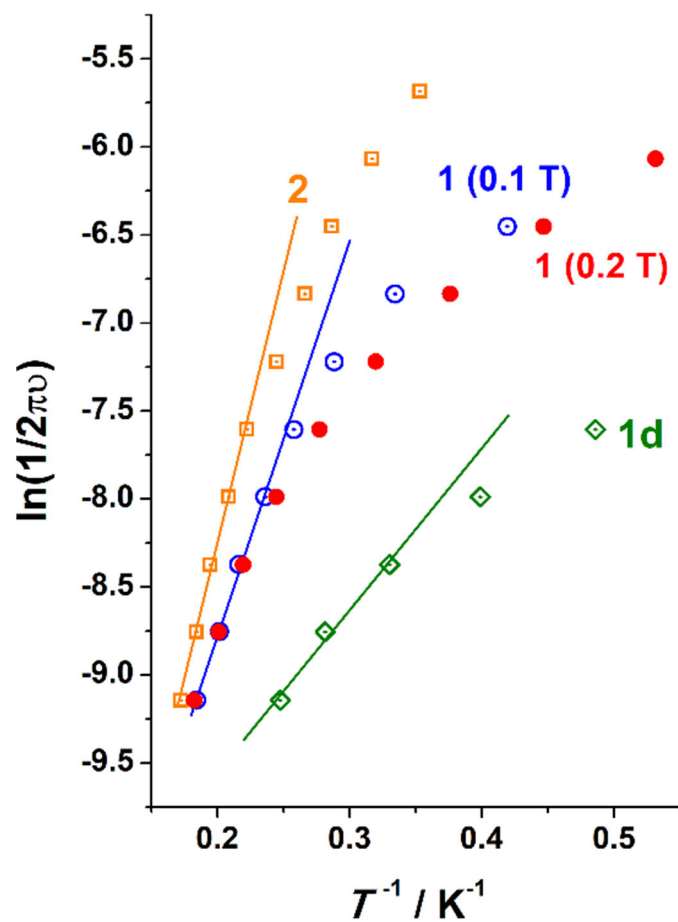

**Fig. S12.** Plot of  $\ln(1/2\pi\nu)$  vs.  $T^{-1}$  from the  $\chi_M''(T)$  data for complexes **1**, **1D** and **2R**. The data are limited to the HF region for which the maxima of  $\chi_M''$  can be observed.

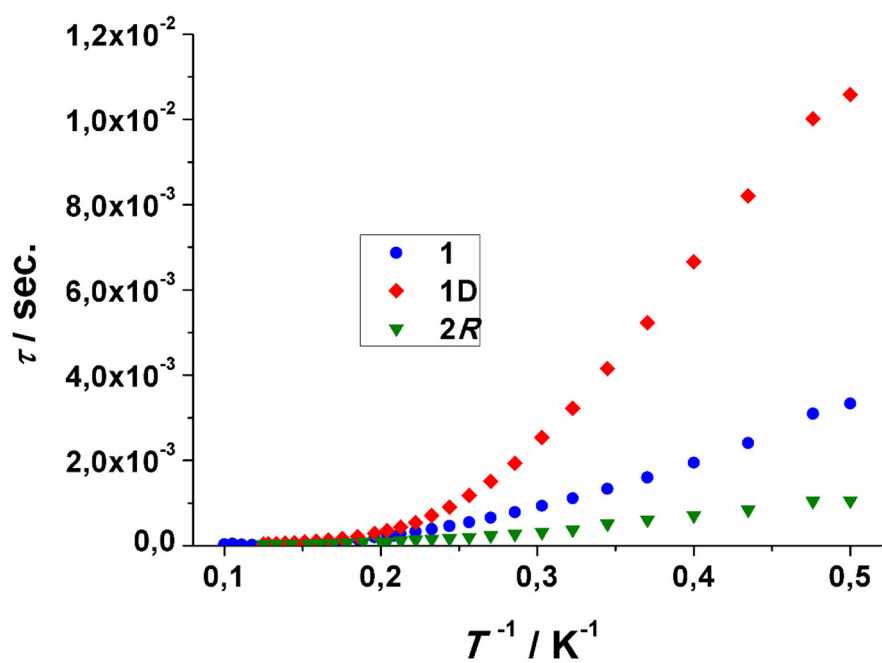

**Fig. S13.** Plot of  $\tau$  vs. inverse of temperature showing the lowtemperature increase of  $t$  for the diluted complex **1D**.
